# Supplementary material for: Characterizing Milk Production Related Genes in Holstein Using RNA-seq
Source: PubMed Central journal article supplement — Asian-Australas J Anim Sci. 2016 Feb 24;29(3):343–51. doi: 10.5713/ajas.15.0525 (PMC4811784; doi:10.5713/ajas.15.0525), 2016-02-24
Supplement: ajas-29-3-343-supplementary.pdf [file ajas-29-3-343-supplementary.pdf]

Supplementary Table S1. Animal information

| Eartag_Number | Parity | Lactation_period | Milk_yield(breeding value) | Milk_fat(breeding value) | Milk_protein(breeding value) | Milk_solid(breeding value) | 305Milk_yield | 305Milk_fat | 305Milk_protein | 305Milk_solid | Milk_yielding_group | Milk_fat_group | Milk_protein_group | Milk_solid_group | RNA-seq | qRT-PCR |
|---------------|--------|------------------|----------------------------|--------------------------|------------------------------|----------------------------|---------------|-------------|-----------------|---------------|---------------------|----------------|--------------------|------------------|---------|---------|
| 2814          | 3      | 41               | 227.5208421                | 2.782903535              | 1.541812942                  | -16.3                      | 7982          | 331         | 251             | 757           | HY                  | HF             | HP                 | LS               | O       | O       |
| 2864          | 4      | 270              | -181.6561079               | -9.927996465             | -6.218437058                 | -16                        | 7116          | 239         | 222             | 631           | LY                  | LF             | LP                 | LS               | O       | O       |
| 2893          | 4      | 59               | -368.8672079               | -4.773246465             | -7.871687058                 | -29.5                      | 7466          | 313         | 259             | 675           | LY                  | LF             | LP                 | LS               | O       | O       |
| 2920          | 4      | 168              | 321.1519921                | 10.92840353              | 6.302362942                  | 23.9                       | 10490         | 374         | 320             | 914           | HY                  | HF             | HP                 | HS               | O       | O       |
| 3014          | 3      | 268              | 269.0759421                | -10.10944647             | 6.839412942                  | 20.9                       | 8341          | 245         | 276             | 751           | HY                  | LF             | HP                 | HS               | O       | O       |
| 3057          | 2      | 265              | 459.0590421                | -1.839946465             | 11.13656294                  | 38.2                       | 11547         | 341         | 345             | 1012          | HY                  | LF             | HP                 | HS               | O       | O       |
| 3064          | 2      | 220              | 468.0531921                | 0.605553535              | 14.58901294                  | 41.4                       | 11353         | 338         | 367             | 996           | HY                  | HF             | HP                 | HS               | O       | O       |
| 3075          | 2      | 101              | 211.4631921                | 3.689903535              | 3.937662942                  | 18                         | 9234          | 364         | 284             | 830           | HY                  | HF             | HP                 | HS               | O       | O       |
| 3135          | 2      | 200              | -211.1092579               | -13.15309647             | -7.584487058                 | 7.4                        | 8569          | 229         | 257             | 675           | LY                  | LF             | LP                 | HS               | O       | O       |
| 3161          | 2      | 167              | -85.19085794               | -8.711046465             | -3.947237058                 | -5.7                       | 9051          | 314         | 272             | 776           | LY                  | LF             | LP                 | LS               | O       | O       |
| 3198          | 2      | 102              | -123.0350079               | -9.007296465             | -2.572587058                 | -6.8                       | 7843          | 305         | 260             | 704           | LY                  | LF             | LP                 | LS               | O       | O       |
| 3235          | 2      | 176              | 212.3058421                | 5.785603535              | 8.392462942                  | 18.9                       | 9790          | 400         | 316             | 846           | HY                  | HF             | HP                 | HS               | O       | O       |
| 3262          | 2      | 65               | 181.1182421                | 1.174853535              | 4.546862942                  | 15.3                       | 10621         | 382         | 327             | 906           | HY                  | HF             | HP                 | HS               | O       | O       |
| 3264          | 2      | 223              | -70.24255794               | -4.109946465             | -1.497987058                 | -3.5                       | 7919          | 322         | 252             | 693           | LY                  | LF             | LP                 | LS               | O       | O       |
| 3272          | 2      | 262              | -47.84085794               | -7.688746465             | -0.930837058                 | -0.8                       | 7319          | 304         | 248             | 659           | LY                  | LF             | LP                 | LS               | O       | O       |
| 3280          | 2      | 108              | 303.7170421                | 1.678803535              | 7.984662942                  | 24.4                       | 9857          | 364         | 320             | 853           | HY                  | HF             | HP                 | HS               | O       | O       |
| 3369          | 2      | 79               | -404.2696079               | -12.21764647             | -9.370337058                 | -27.2                      | 8339          | 322         | 271             | 751           | LY                  | LF             | LP                 | LS               | O       | O       |
| 3407          | 2      | 52               | -364.0948079               | -14.37744647             | -13.24018706                 | -29.9                      | 6362          | 283         | 204             | 564           | LY                  | LF             | LP                 | LS               | O       | O       |
| 7598          | 3      | 243              | -27.52599206               | -7.630746465             | -0.095987058                 | -0.7                       | 9552          | 293         | 293             | 824           | LY                  | LF             | LP                 | LS               | O       | O       |
| 7628          | 3      | 239              | -86.91994206               | -2.782246465             | 1.267662942                  | 8.3                        | 9944          | 325         | 302             | 883           | LY                  | LF             | HP                 | HS               | O       | O       |
| 7643          | 2      | 224              | -70.47735794               | -3.486696465             | -0.887587058                 | -3.9                       | 8115          | 326         | 268             | 719           | LY                  | LF             | LP                 | LS               | O       | O       |
| 3047          | 2      | 29               | 236.3456921                | 5.6                      | 6.6                          | 21                         | na            | na          | 6.6             | na            | HY                  | HF             | HP                 | HS               | X       | O       |
| 3059          | 3      | 164              | 260.4742421                | 8.1                      | 6.2                          | 20.3                       | na            | na          | na              | na            | HY                  | HF             | HP                 | HS               | X       | O       |
| 3100          | 2      | 203              | 195.3485921                | -6.6                     | -2.6                         | 8                          | na            | na          | na              | na            | HY                  | LF             | LP                 | HS               | X       | O       |
| 3190          | 2      | na               | 177.3057421                | 1.39                     | 4.08                         | 15.2                       | na            | na          | na              | na            | HY                  | HF             | HP                 | HS               | X       | O       |
| 3328          | 2      | 127              | -159.0945579               | -11.1                    | -6.8                         | -10.8                      | na            | na          | na              | na            | LY                  | LF             | LP                 | LS               | X       | O       |

Supplementary Table S2. Significant GO-terms from the DAVID analysis

| Category | Term                                                                    | Count | %        | Genes                                                          | List Total | Pop Hits | Pop Total | d Enrichm | PValue   |
|----------|-------------------------------------------------------------------------|-------|----------|----------------------------------------------------------------|------------|----------|-----------|-----------|----------|
| GOTERM_  | GO:0006690~icosanoid metabolic process                                  | 3     | 0.131234 | ALOX15B, EDN2, LOC782922                                       | 132        | 32       | 8785      | 6.239347  | 0.081895 |
| GOTERM_  | GO:0033559~unsaturated fatty acid metabolic process                     | 3     | 0.131234 | ALOX15B, EDN2, LOC782922                                       | 132        | 32       | 8785      | 6.239347  | 0.081895 |
| GOTERM_  | GO:0031640~killing of cells of another organism                         | 4     | 0.174978 | CATHL4, LAP, ALB, CATHL6                                       | 132        | 6        | 8785      | 44.36869  | 6.27E-05 |
| GOTERM_  | GO:0001906~cell killing                                                 | 4     | 0.174978 | CATHL4, LAP, ALB, CATHL6                                       | 132        | 12       | 8785      | 22.18434  | 6.46E-04 |
| GOTERM_  | GO:0050832~defense response to fungus                                   | 3     | 0.131234 | CATHL4, LAP, CATHL6                                            | 132        | 8        | 8785      | 24.95739  | 0.005826 |
| GOTERM_  | GO:0009620~response to fungus                                           | 3     | 0.131234 | CATHL4, LAP, CATHL6                                            | 132        | 15       | 8785      | 13.31061  | 0.020408 |
| GOTERM_  | GO:0006952~defense response                                             | 8     | 0.349956 | CATHL4, LAT, TNF, LAP, LOC781146, CAMP, CATHL6, C4BPA          | 132        | 223      | 8785      | 2.387553  | 0.049012 |
| GOTERM_  | GO:0009617~response to bacterium                                        | 7     | 0.306212 | CATHL4, STAT4, TNF, LAP, LOC781146, CAMP, CATHL6               | 132        | 88       | 8785      | 5.293991  | 0.001956 |
| GOTERM_  | GO:0042742~defense response to bacterium                                | 6     | 0.262467 | CATHL4, TNF, LAP, LOC781146, CAMP, CATHL6                      | 132        | 55       | 8785      | 7.260331  | 0.001308 |
| GOTERM_  | GO:0055080~cation homeostasis                                           | 5     | 0.218723 | CAV1, EDN2, LOC525947, ATP6V1B1, CSRP3                         | 132        | 115      | 8785      | 2.89361   | 0.092664 |
| GOTERM_  | GO:0050880~regulation of blood vessel size                              | 3     | 0.131234 | CAV1, EDN2, NOS3                                               | 132        | 31       | 8785      | 6.440616  | 0.07751  |
| GOTERM_  | GO:0035150~regulation of tube size                                      | 3     | 0.131234 | CAV1, EDN2, NOS3                                               | 132        | 31       | 8785      | 6.440616  | 0.07751  |
| GOTERM_  | GO:0003018~vascular process in circulatory system                       | 3     | 0.131234 | CAV1, EDN2, NOS3                                               | 132        | 31       | 8785      | 6.440616  | 0.07751  |
| GOTERM_  | GO:0009725~response to hormone stimulus                                 | 4     | 0.174978 | CAV1, EIF4EBP1, TNF, FHL2                                      | 132        | 53       | 8785      | 5.02287   | 0.044233 |
| GOTERM_  | GO:0009719~response to endogenous stimulus                              | 4     | 0.174978 | CAV1, EIF4EBP1, TNF, FHL2                                      | 132        | 62       | 8785      | 4.293744  | 0.06493  |
| GOTERM_  | GO:0031327~negative regulation of cellular biosynthetic process         | 7     | 0.306212 | CAV1, EIF4EBP1, TNF, FOXA1, HR, LMCD1, CBY1                    | 132        | 189      | 8785      | 2.464927  | 0.06318  |
| GOTERM_  | GO:0009890~negative regulation of biosynthetic process                  | 7     | 0.306212 | CAV1, EIF4EBP1, TNF, FOXA1, HR, LMCD1, CBY1                    | 132        | 195      | 8785      | 2.389083  | 0.071203 |
| GOTERM_  | GO:0060056~mammary gland involution                                     | 2     | 0.087489 | CAV1, ELF3                                                     | 132        | 2        | 8785      | 66.55303  | 0.029603 |
| GOTERM_  | GO:0060443~mammary gland morphogenesis                                  | 2     | 0.087489 | CAV1, ELF3                                                     | 132        | 2        | 8785      | 66.55303  | 0.029603 |
| GOTERM_  | GO:0030879~mammary gland development                                    | 3     | 0.131234 | CAV1, ELF3, HOXA9                                              | 132        | 21       | 8785      | 9.507576  | 0.038518 |
| GOTERM_  | GO:0048514~blood vessel morphogenesis                                   | 6     | 0.262467 | CAV1, HOXA3, CTGF, NOS3, CDH2, CXCL12                          | 132        | 99       | 8785      | 4.033517  | 0.016008 |
| GOTERM_  | GO:0001568~blood vessel development                                     | 6     | 0.262467 | CAV1, HOXA3, CTGF, NOS3, CDH2, CXCL12                          | 132        | 118      | 8785      | 3.384052  | 0.031383 |
| GOTERM_  | GO:0001944~vasculature development                                      | 6     | 0.262467 | CAV1, HOXA3, CTGF, NOS3, CDH2, CXCL12                          | 132        | 121      | 8785      | 3.30015   | 0.034437 |
| GOTERM_  | GO:0048732~gland development                                            | 5     | 0.218723 | CAV1, HOXA3, ELF3, FOXA1, HOXA9                                | 132        | 56       | 8785      | 5.942235  | 0.009536 |
| GOTERM_  | GO:0048771~tissue remodeling                                            | 4     | 0.174978 | CAV1, HOXA3, ELF3, NOS3                                        | 132        | 27       | 8785      | 9.859708  | 0.007297 |
| GOTERM_  | GO:0015674~di-, tri-valent inorganic cation transport                   | 5     | 0.218723 | CAV1, LOC525947, CACNB3, CACNG2, CACNG1                        | 132        | 104      | 8785      | 3.199665  | 0.069603 |
| GOTERM_  | GO:0006937~regulation of muscle contraction                             | 3     | 0.131234 | CAV1, MYL3, EDN2                                               | 132        | 25       | 8785      | 7.986364  | 0.052952 |
| GOTERM_  | GO:0003013~circulatory system process                                   | 4     | 0.174978 | CAV1, MYL3, EDN2, NOS3                                         | 132        | 71       | 8785      | 3.749466  | 0.08928  |
| GOTERM_  | GO:0008015~blood circulation                                            | 4     | 0.174978 | CAV1, MYL3, EDN2, NOS3                                         | 132        | 71       | 8785      | 3.749466  | 0.08928  |
| GOTERM_  | GO:0044057~regulation of system process                                 | 5     | 0.218723 | CAV1, MYL3, EDN2, NOS3, CSRP3                                  | 132        | 89       | 8785      | 3.738934  | 0.043681 |
| GOTERM_  | GO:0043085~positive regulation of catalytic activity                    | 6     | 0.262467 | CAV1, TNF, EDN2, NOS3, KIT, CISH                               | 132        | 149      | 8785      | 2.679988  | 0.071732 |
| GOTERM_  | GO:0019915~lipid storage                                                | 3     | 0.131234 | CAV1, TNF, PLIN2                                               | 132        | 13       | 8785      | 15.35839  | 0.015458 |
| GOTERM_  | GO:0042522~regulation of tyrosine phosphorylation of Stat5 protein      | 2     | 0.087489 | CSF2, CAV1                                                     | 132        | 7        | 8785      | 19.01515  | 0.09986  |
| GOTERM_  | GO:0050730~regulation of peptidyl-tyrosine phosphorylation              | 3     | 0.131234 | CSF2, CAV1, FGFR3                                              | 132        | 31       | 8785      | 6.440616  | 0.07751  |
| GOTERM_  | GO:0042127~regulation of cell proliferation                             | 10    | 0.437445 | CSF2, CAV1, HOXA3, TNF, FGFR3, ALOX15B, EDN2, MMP7, KIT, CXADR | 132        | 275      | 8785      | 2.42011   | 0.021608 |
| GOTERM_  | GO:0001932~regulation of protein amino acid phosphorylation             | 4     | 0.174978 | CSF2, CAV1, TNF, FGFR3                                         | 132        | 74       | 8785      | 3.597461  | 0.098136 |
| GOTERM_  | GO:0008284~positive regulation of cell proliferation                    | 6     | 0.262467 | CSF2, HOXA3, TNF, FGFR3, EDN2, KIT                             | 132        | 153      | 8785      | 2.609923  | 0.078365 |
| GOTERM_  | GO:0006916~anti-apoptosis                                               | 4     | 0.174978 | CSF2, TNF, EEF1A2, NOS3                                        | 132        | 63       | 8785      | 4.225589  | 0.067462 |
| GOTERM_  | GO:0032270~positive regulation of cellular protein metabolic process    | 4     | 0.174978 | CSF2, TNF, FGFR3, KRT17                                        | 132        | 73       | 8785      | 3.646741  | 0.095145 |
| GOTERM_  | GO:0051094~positive regulation of developmental process                 | 6     | 0.262467 | CSF2, TNF, FGFR3, KRT17, FOXA1, NOS3                           | 132        | 113      | 8785      | 3.533789  | 0.026683 |
| GOTERM_  | GO:0043067~regulation of programmed cell death                          | 9     | 0.393701 | CSF2, TNF, FGFR3, SNCB, ALB, EEF1A2, NOS3, KIT, TRAF4          | 132        | 298      | 8785      | 2.009991  | 0.076977 |
| GOTERM_  | GO:0010941~regulation of cell death                                     | 9     | 0.393701 | CSF2, TNF, FGFR3, SNCB, ALB, EEF1A2, NOS3, KIT, TRAF4          | 132        | 299      | 8785      | 2.003268  | 0.078145 |
| GOTERM_  | GO:0002573~myeloid leukocyte differentiation                            | 3     | 0.131234 | CSF2, TNF, KIT                                                 | 132        | 14       | 8785      | 14.26136  | 0.01786  |
| GOTERM_  | GO:0043066~negative regulation of apoptosis                             | 6     | 0.262467 | CSF2, TNF, SNCB, ALB, EEF1A2, NOS3                             | 132        | 146      | 8785      | 2.735056  | 0.06697  |
| GOTERM_  | GO:0060548~negative regulation of cell death                            | 7     | 0.306212 | CSF2, TNF, SNCB, ALB, EEF1A2, NOS3, KIT                        | 132        | 148      | 8785      | 3.147778  | 0.023136 |
| GOTERM_  | GO:0043069~negative regulation of programmed cell death                 | 7     | 0.306212 | CSF2, TNF, SNCB, ALB, EEF1A2, NOS3, KIT                        | 132        | 148      | 8785      | 3.147778  | 0.023136 |
| GOTERM_  | GO:0001503~ossification                                                 | 4     | 0.174978 | CTGF, FHL2, IGF2, ATP6V1B1                                     | 132        | 54       | 8785      | 4.929854  | 0.046341 |
| GOTERM_  | GO:0060348~bone development                                             | 4     | 0.174978 | CTGF, FHL2, IGF2, ATP6V1B1                                     | 132        | 54       | 8785      | 4.929854  | 0.046341 |
| GOTERM_  | GO:0003100~regulation of systemic arterial blood pressure by endothelin | 2     | 0.087489 | EDN2, NOS3                                                     | 132        | 3        | 8785      | 44.36869  | 0.044077 |
| GOTERM_  | GO:0008543~fibroblast growth factor receptor signaling pathway          | 2     | 0.087489 | FGFR3, CTGF                                                    | 132        | 6        | 8785      | 22.18434  | 0.086224 |
| GOTERM_  | GO:0003006~reproductive developmental process                           | 5     | 0.218723 | FOXA1, DMRT1, NOS3, KIT, CXCL12                                | 132        | 96       | 8785      | 3.466304  | 0.054963 |
| GOTERM_  | GO:0001501~skeletal system development                                  | 6     | 0.262467 | HOXA3, CTGF, HOXA9, FHL2, IGF2, ATP6V1B1                       | 132        | 120      | 8785      | 3.327652  | 0.033399 |
| GOTERM_  | GO:0008354~germ cell migration                                          | 2     | 0.087489 | KIT, CXCL12                                                    | 132        | 7        | 8785      | 19.01515  | 0.09986  |
| GOTERM_  | GO:0045109~intermediate filament organization                           | 2     | 0.087489 | KRT17, KRT14                                                   | 132        | 6        | 8785      | 22.18434  | 0.086224 |

|         |                                                                             |    |          |                                                                                         |     |     |      |          |          |
|---------|-----------------------------------------------------------------------------|----|----------|-----------------------------------------------------------------------------------------|-----|-----|------|----------|----------|
| GOTERM_ | GO:0006108~malate metabolic process                                         | 2  | 0.087489 | ME1, ME3                                                                                | 132 | 6   | 8785 | 22.18434 | 0.086224 |
| GOTERM_ | GO:0043648~dicarboxylic acid metabolic process                              | 3  | 0.131234 | ME1, ME3, QPRT                                                                          | 132 | 14  | 8785 | 14.26136 | 0.01786  |
| GOTERM_ | GO:0007155~cell adhesion                                                    | 9  | 0.393701 | MIA, TNF, PKP1, CTGF, PECAM1, FBLIM1, BCAM, CDH2, CXADR                                 | 132 | 306 | 8785 | 1.957442 | 0.086616 |
| GOTERM_ | GO:0022610~biological adhesion                                              | 9  | 0.393701 | MIA, TNF, PKP1, CTGF, PECAM1, FBLIM1, BCAM, CDH2, CXADR                                 | 132 | 306 | 8785 | 1.957442 | 0.086616 |
| GOTERM_ | GO:0048738~cardiac muscle tissue development                                | 4  | 0.174978 | MYL3, CBY1, CXADR, CSRP3                                                                | 132 | 29  | 8785 | 9.179728 | 0.008921 |
| GOTERM_ | GO:0008016~regulation of heart contraction                                  | 3  | 0.131234 | MYL3, EDN2, CSRP3                                                                       | 132 | 29  | 8785 | 6.884796 | 0.068976 |
| GOTERM_ | GO:0007169~transmembrane receptor protein tyrosine kinase signaling pathway | 7  | 0.306212 | PLAT, EPHA4, EIF4EBP1, FGFR3, CTGF, KIT, EPHA1                                          | 132 | 92  | 8785 | 5.063818 | 0.002452 |
| GOTERM_ | GO:0007167~enzyme linked receptor protein signaling pathway                 | 7  | 0.306212 | PLAT, EPHA4, EIF4EBP1, FGFR3, CTGF, KIT, EPHA1                                          | 132 | 138 | 8785 | 3.375878 | 0.017002 |
| GOTERM_ | GO:0006928~cell motion                                                      | 10 | 0.437445 | PLAT, EPHA4, TNF, CTGF, EDN2, TEK2, NOS3, CDH2, KIT, CXCL12                             | 132 | 148 | 8785 | 4.496826 | 3.54E-04 |
| GOTERM_ | GO:0016477~cell migration                                                   | 8  | 0.349956 | PLAT, TNF, CTGF, EDN2, NOS3, CDH2, KIT, CXCL12                                          | 132 | 114 | 8785 | 4.670388 | 0.001531 |
| GOTERM_ | GO:0051674~localization of cell                                             | 9  | 0.393701 | PLAT, TNF, CTGF, EDN2, TEK2, NOS3, CDH2, KIT, CXCL12                                    | 132 | 124 | 8785 | 4.830462 | 5.10E-04 |
| GOTERM_ | GO:0048870~cell motility                                                    | 9  | 0.393701 | PLAT, TNF, CTGF, EDN2, TEK2, NOS3, CDH2, KIT, CXCL12                                    | 132 | 124 | 8785 | 4.830462 | 5.10E-04 |
| GOTERM_ | GO:0007242~intracellular signaling cascade                                  | 14 | 0.612423 | RHOJ, CAV1, TNF, FGFR3, EDN2, PECAM1, RAB34, CHN1, RTKN, RHOD, KIT, NEURL2, ASB15, CISH | 132 | 498 | 8785 | 1.870969 | 0.034331 |
| GOTERM_ | GO:0008360~regulation of cell shape                                         | 3  | 0.131234 | RHOJ, FBLIM1, PALMD                                                                     | 132 | 24  | 8785 | 8.319129 | 0.049185 |
| GOTERM_ | GO:0007266~Rho protein signal transduction                                  | 3  | 0.131234 | RHOJ, PECAM1, RTKN                                                                      | 132 | 14  | 8785 | 14.26136 | 0.01786  |
| GOTERM_ | GO:0007265~Ras protein signal transduction                                  | 3  | 0.131234 | RHOJ, PECAM1, RTKN                                                                      | 132 | 27  | 8785 | 7.394781 | 0.06078  |
| GOTERM_ | GO:0030036~actin cytoskeleton organization                                  | 5  | 0.218723 | RHOJ, PFN2, CNN1, DBN1, EHD2                                                            | 132 | 84  | 8785 | 3.96149  | 0.036508 |
| GOTERM_ | GO:0030029~actin filament-based process                                     | 5  | 0.218723 | RHOJ, PFN2, CNN1, DBN1, EHD2                                                            | 132 | 86  | 8785 | 3.869362 | 0.039289 |
| GOTERM_ | GO:0007010~cytoskeleton organization                                        | 8  | 0.349956 | RHOJ, PFN2, KRT17, KRT14, TEK2, CNN1, DBN1, EHD2                                        | 132 | 167 | 8785 | 3.188169 | 0.012325 |
| GOTERM_ | GO:0014706~striated muscle tissue development                               | 7  | 0.306212 | SRPK3, CAV1, MYL3, CACNG2, CBY1, CXADR, CSRP3                                           | 132 | 65  | 8785 | 7.167249 | 3.94E-04 |
| GOTERM_ | GO:0060537~muscle tissue development                                        | 7  | 0.306212 | SRPK3, CAV1, MYL3, CACNG2, CBY1, CXADR, CSRP3                                           | 132 | 68  | 8785 | 6.851047 | 5.03E-04 |
| GOTERM_ | GO:0007517~muscle organ development                                         | 7  | 0.306212 | SRPK3, CAV1, MYL3, CACNG2, CBY1, CXADR, CSRP3                                           | 132 | 86  | 8785 | 5.417107 | 0.001738 |
| GOTERM_ | GO:0019221~cytokine-mediated signaling pathway                              | 5  | 0.218723 | STAT4, TNF, EDN2, KRT8, KIT                                                             | 132 | 25  | 8785 | 13.31061 | 4.69E-04 |
| GOTERM_ | GO:0048584~positive regulation of response to stimulus                      | 7  | 0.306212 | TNF, EDN2, CACNB3, IGF2, C4BPA, CXCL12, NCR3                                            | 132 | 114 | 8785 | 4.08659  | 0.007035 |
| GOTERM_ | GO:0051798~positive regulation of hair follicle development                 | 2  | 0.087489 | TNF, KRT17                                                                              | 132 | 4   | 8785 | 33.27652 | 0.058336 |
| GOTERM_ | GO:0042634~regulation of hair cycle                                         | 2  | 0.087489 | TNF, KRT17                                                                              | 132 | 5   | 8785 | 26.62121 | 0.072384 |
| GOTERM_ | GO:0045684~positive regulation of epidermis development                     | 2  | 0.087489 | TNF, KRT17                                                                              | 132 | 5   | 8785 | 26.62121 | 0.072384 |
| GOTERM_ | GO:0051797~regulation of hair follicle development                          | 2  | 0.087489 | TNF, KRT17                                                                              | 132 | 5   | 8785 | 26.62121 | 0.072384 |
| GOTERM_ | GO:0033209~tumor necrosis factor-mediated signaling pathway                 | 2  | 0.087489 | TNF, KRT8                                                                               | 132 | 4   | 8785 | 33.27652 | 0.058336 |
